# Supplementary material for: Fasting Proinsulin Independently Predicts Incident Type 2 Diabetes in the General Population
Source: MDPI journal article supplement (doi:10.3390/jpm12071131), 2022-07-12
Supplement: s1 [file s1]

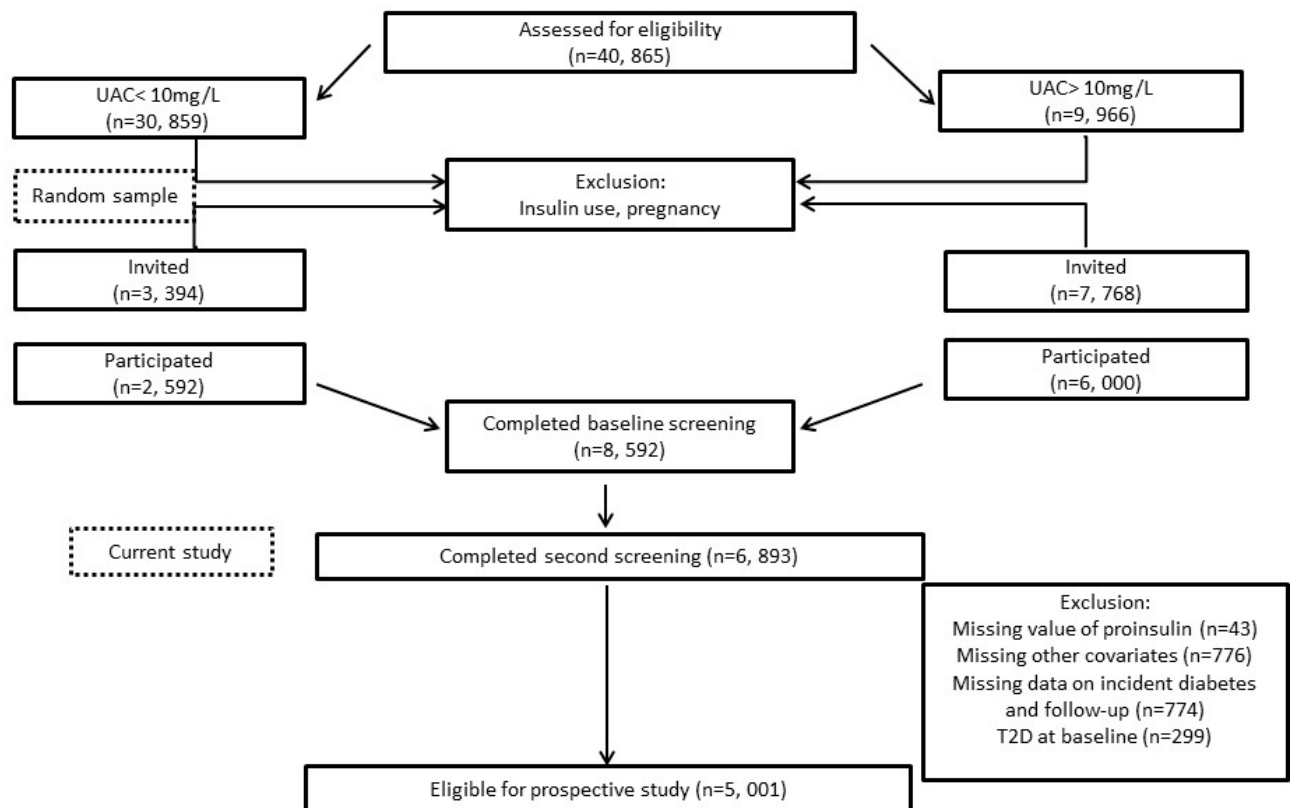

**Figure S1.** Detailed information on reason of exclusion and numbers of missing values of proinsulin measurement, other covariates, and loss to follow-up for the analyses on proinsulin and their association with incident type 2 diabetes (T2D) in The PREVEND study.

**Table S1.** Uni and Multi variable adjusted linear regression analyses with log-transformed proinsulin as dependent variable in 5,001 participants of the PREVEND study.

| Variables                               | Univariable          |                | Multivariable adjusted (<br>R <sup>2</sup> =0.442) |                |
|-----------------------------------------|----------------------|----------------|----------------------------------------------------|----------------|
|                                         | Standardized $\beta$ | <i>p</i> value | Standardized $\beta$                               | <i>P</i> value |
| Sex, female vs. male                    | -0.214               | <0.001         | -0.125                                             | <0.001         |
| Age, years                              | 0.294                | <0.001         | 0.072                                              | <0.001         |
| Family history of Diabetes, yes vs. no  | 0.073                | <0.001         | 0.014                                              | 0.222          |
| Current smoking, yes vs. no             | -0.014               | 0.33           | -                                                  | -              |
| Alcohol, yes vs. no                     | -0.065               | <0.001         | -0.007                                             | 0.552          |
| BMI, kg/m <sup>2</sup>                  | 0.432                | <0.001         | 0.076                                              | <0.001         |
| Systolic blood pressure, mm Hg          | 0.307                | <0.001         | 0.008                                              | 0.657          |
| Antihypertensive medication, yes vs. no | 0.219                | <0.001         | -0.009                                             | 0.573          |
| Cholesterol, mmol/L                     | 0.110                | <0.001         | -0.032                                             | 0.021          |
| HDL cholesterol, mmol/L                 | -0.306               | <0.001         | 0.002                                              | 0.902          |
| Triglycerides, mmol/L                   | 0.372                | <0.001         | 0.064                                              | <0.001         |
| Lipid-lowering medication, yes vs. no   | 0.158                | <0.001         | 0.017                                              | 0.143          |
| Glucose, mmol/L                         | 0.379                | <0.001         | 0.112                                              | <0.001         |
| Insulin (mU/L)                          | 0.537                | <0.001         | 0.127                                              | <0.001         |
| C-peptide (pmol/L)                      | 0.613                | <0.001         | 0.333                                              | <0.001         |
| eGFR, mL/min/1.73 m <sup>2</sup>        | -0.268               | <0.001         | -0.019                                             | 0.197          |
| Urinary albumin excretion, mg/24 hours  | 0.243                | <0.001         | 0.054                                              | <0.001         |

BMI: body mass index; HDL: high-density lipoprotein; eGFR: estimated glomerular filtration rate; PREVEND: Prevention of renal and vascular End-stage Disease

**Table S2.**Competing risk model of proinsulin to mortality and incident T2D in 5001 participants without diabetes.

|                     | Subhazard Ratio (95% CI) | <i>p</i> value |
|---------------------|--------------------------|----------------|
| Crude analysis      | 2.57 (2.25–2.93)         | <0.001         |
| Model1              | 2.47 (2.16–2.83)         | <0.001         |
| Model2              | 2.45 (2.14–2.80)         | <0.001         |
| Model3              | 1.98 (1.71–2.31)         | <0.001         |
| Model4 <sup>†</sup> | 1.82 (1.57–2.11)         | <0.001         |
| Model5              | 1.85 (1.59–2.15)         | <0.001         |
| Model 6             | 1.32 (1.11-1.57          | 0.002          |
| Model 7             | 1.27 (1.08-1.59)         | 0.005          |
| Model 8             | 1.23 (1.00–1.51)         | <0.044         |

Subhazard Ratio (95% CIs) were derived from competing risk analyses by Fine and Gray .

Model 1 is adjusted for age and sex.

Model 2 is additionally adjusted for smoking status and alcohol consumption.

Model 3 is additionally adjusted for BMI, family history of diabetes and hypertension.

Model 4 is additionally adjusted for triglycerides, total cholesterol and HDL cholesterol.

Model 5 is additionally adjusted for eGFR and urinary albumin excretion.

Model 6 is additionally adjusted for glucose

Model 7 is additionally adjusted for insulin

Model 8 is additionally adjusted for C-peptide

eGFR: estimated glomerular filtration rate; PREVENT: Prevention of renal and vascular End-stage Disease.
